# Supplementary material for: Insight into Tetramolecular DNA G-Quadruplexes Associated with ALS and FTLD: Cation Interactions and Formation of Higher-Ordered Structure
Source: MDPI journal article supplement (doi:10.3390/ijms241713437), 2023-08-30
Supplement: s1 [file s1]

Supplementary information for:

# Insight into tetramolecular DNA G-quadruplexes associated with ALS and FTLD: Cation interactions and formation of higher ordered structure

Matja Zalar<sup>1</sup>, Baifan Wang<sup>1</sup>, Janez Plavec<sup>1,2,3</sup> and Primož Šket<sup>1,\*</sup>

<sup>1</sup> Slovenian NMR Center, National Institute of Chemistry, Hajdrihova 19, SI-1000 Ljubljana, Slovenia

<sup>2</sup> EN-FIST Center of Excellence, Trg OF 13, SI-1000 Ljubljana, Slovenia

<sup>3</sup> Faculty of Chemistry and Chemical Technology, University of Ljubljana, Večna pot 113, SI-1000 Ljubljana, Slovenia

\* Correspondence: primoz.sket@ki Tel: +386 1 4760223; Fax: +386 1 4760300

## SUPPLEMENTARY FIGURES

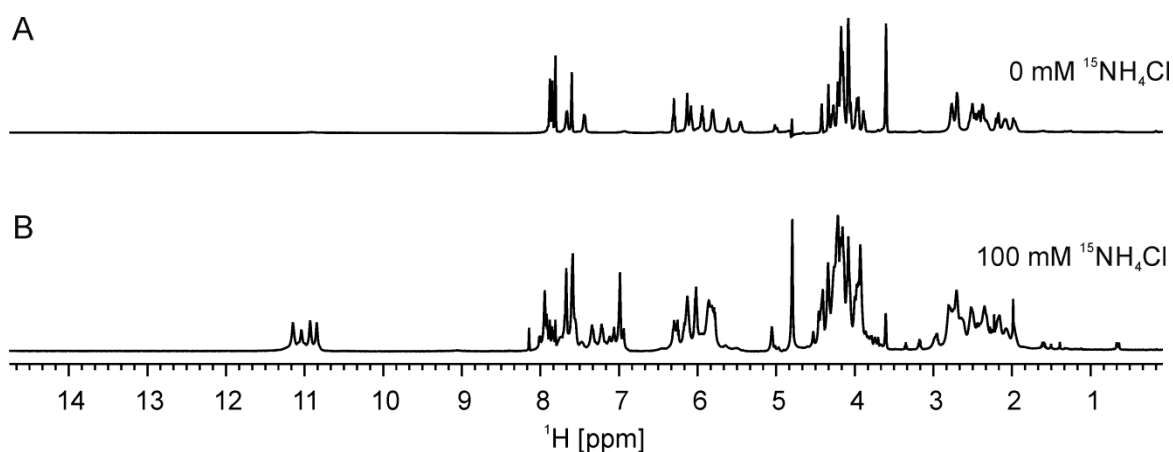

Figure S1: <sup>1</sup>H NMR spectrum of d(G<sub>4</sub>C<sub>2</sub>) A) before and B) after addition of 100 mM <sup>15</sup>NH<sub>4</sub><sup>+</sup> ions. Both spectra were recorded in 10% of <sup>2</sup>H<sub>2</sub>O on 600 MHz NMR spectrometer at 25 °C, pH 6.0. Oligonucleotide concentration was 2.0 mM.

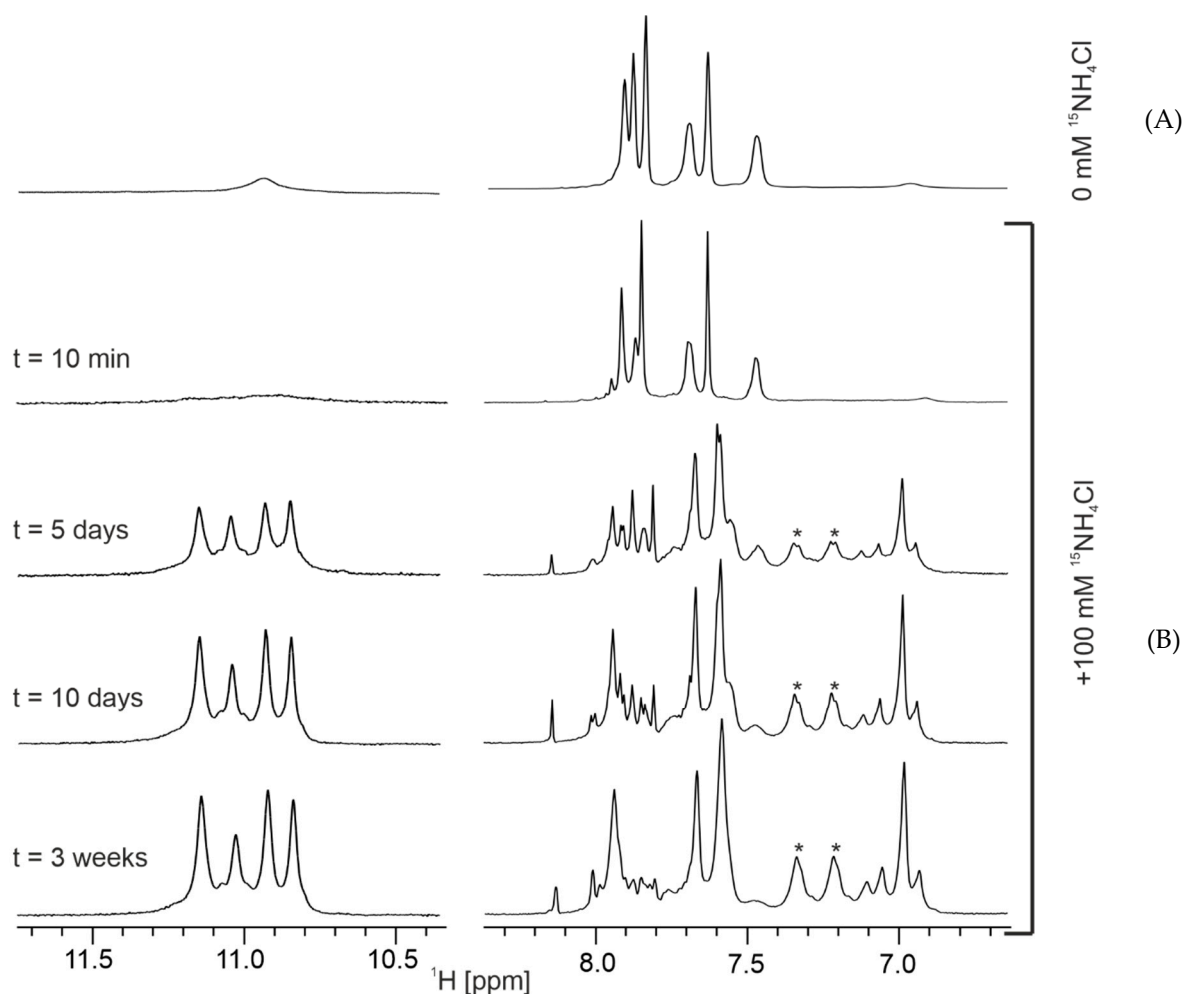

Figure S2: Imino (A) and aromatic (B) regions of  $^1\text{H}$  NMR spectra of oligonucleotide  $\text{d}(\text{G}_4\text{C}_2)$  before and after addition of 100 mM  $^{15}\text{NH}_4^+$  ions concentration as a function of time. Intensities in A were enlarged two times in respect to other signals. Asterisks denote signals of ammonium ions at binding site O5. All spectra were recorded in 10% of  $^2\text{H}_2\text{O}$  at  $25^\circ\text{C}$ , pH 6.0 on 600 MHz NMR spectrometer. Oligonucleotide concentration was 2.0 mM.

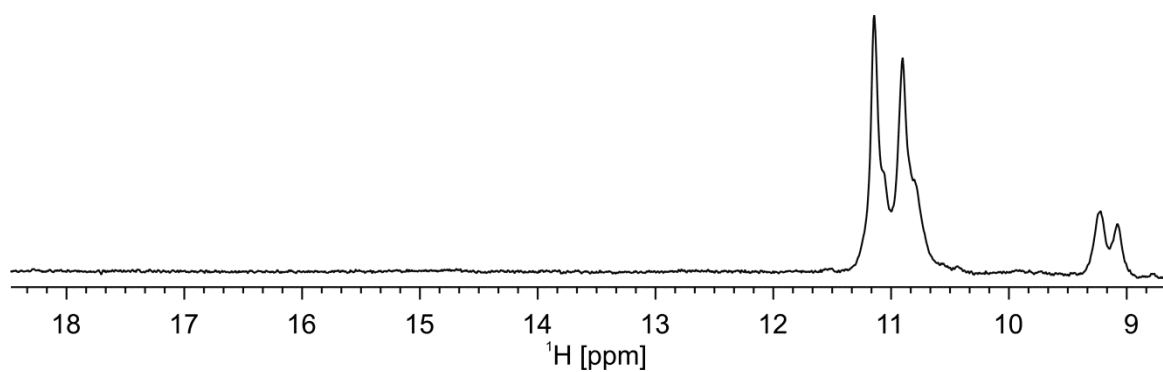

Figure S3: Imino region of  $^1\text{H}$  NMR spectrum of  $[\text{d}(\text{G}_4\text{C}_2)]_4$  G-quadruplex in the presence of 100 mM  $^{15}\text{NH}_4\text{Cl}$  at 5 °C, pH 4.5. Spectrum was recorded on 600 MHz NMR spectrometer at 2 mM oligonucleotide concentration.

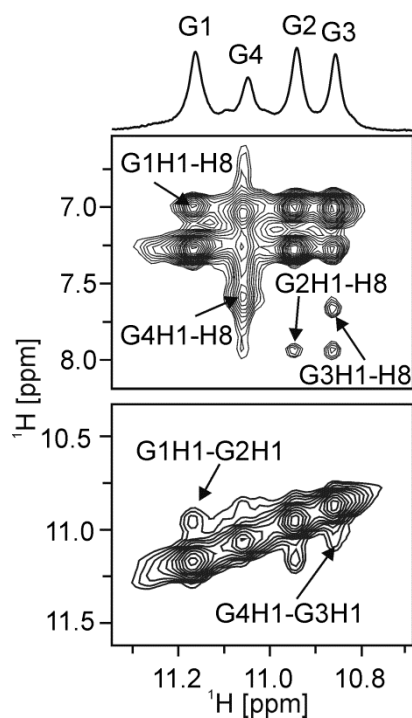

Figure S4: Imino -aromatic and imino-imino regions of  $^{15}\text{N}$  decoupled NOESY spectrum ( $\tau_m = 150$  ms) of  $[\text{d}(\text{G}_4\text{C}_2)]_4$ . Assignments are shown next to corresponding cross-peaks. Imino region of  $^1\text{H}$  spectrum is shown on top together with signal assignments. Spectrum was recorded on 600 MHz NMR spectrometer, 25 °C in 90%  $\text{H}_2\text{O}$  and 10%  $^2\text{H}_2\text{O}$ , 100 mM  $^{15}\text{NH}_4\text{Cl}$ , pH 6.0. Oligonucleotide concentration was 2 mM.

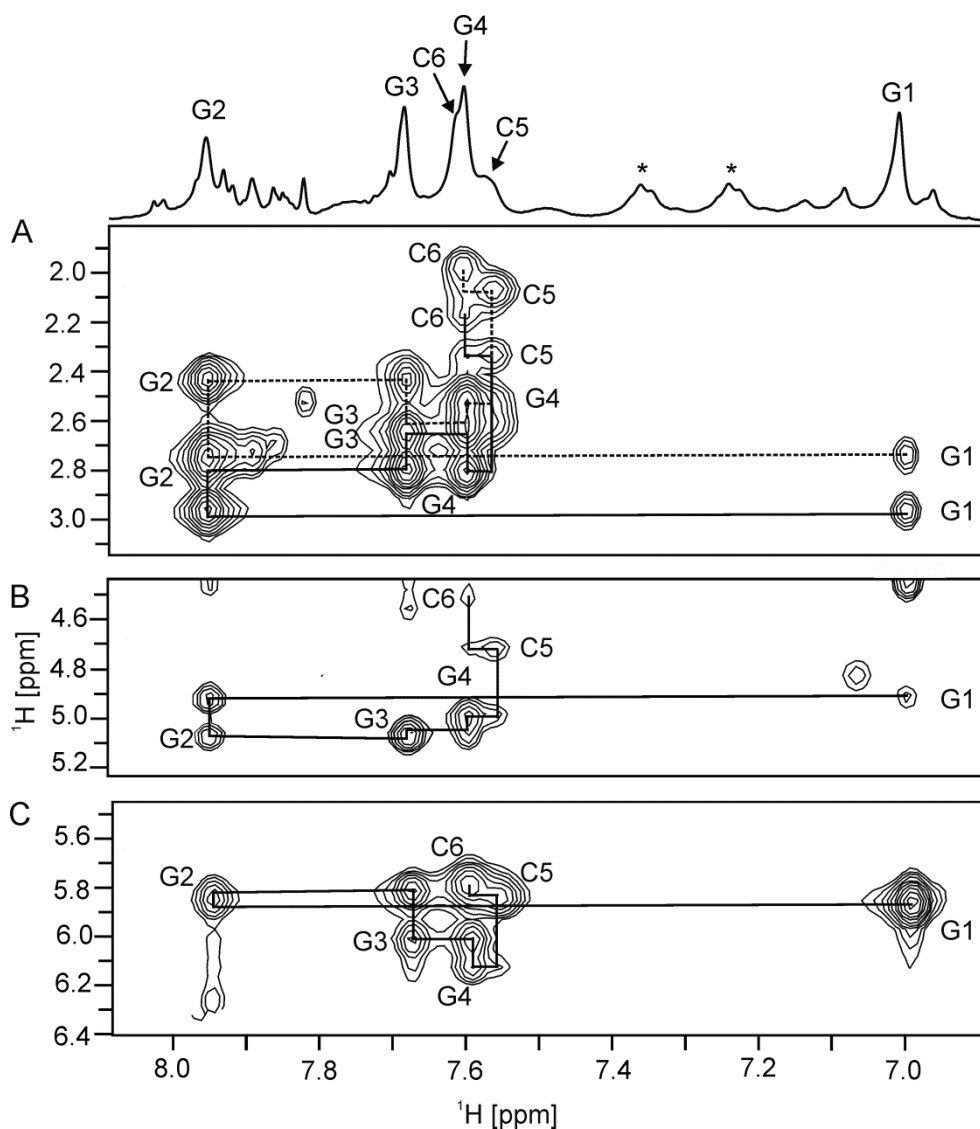

Figure S5: The aromatic H6/H8 –sugar H2'/H2'' (A), H3' (B) and H1' (C) regions of NOESY spectrum ( $\tau_m = 150$  ms) of  $[d(G_4C_2)]_4$ . All sequential walks except H8/H6-H2', which is shown with dashed black line, are depicted in solid black lines. Assignments are shown next to corresponding cross-peaks. Aromatic region of  $^1H$  NMR spectrum is shown on top together with signal assignments. Signals labeled with stars correspond to  $^{15}NH_4^+$  ions at binding site O5. Spectrum was recorded on 600 MHz NMR spectrometer, 25 °C in 90%  $H_2O$  and 10%  $^2H_2O$ , 100 mM  $^{15}NH_4Cl$ , pH 6.0. Oligonucleotide concentration was 2 mM.

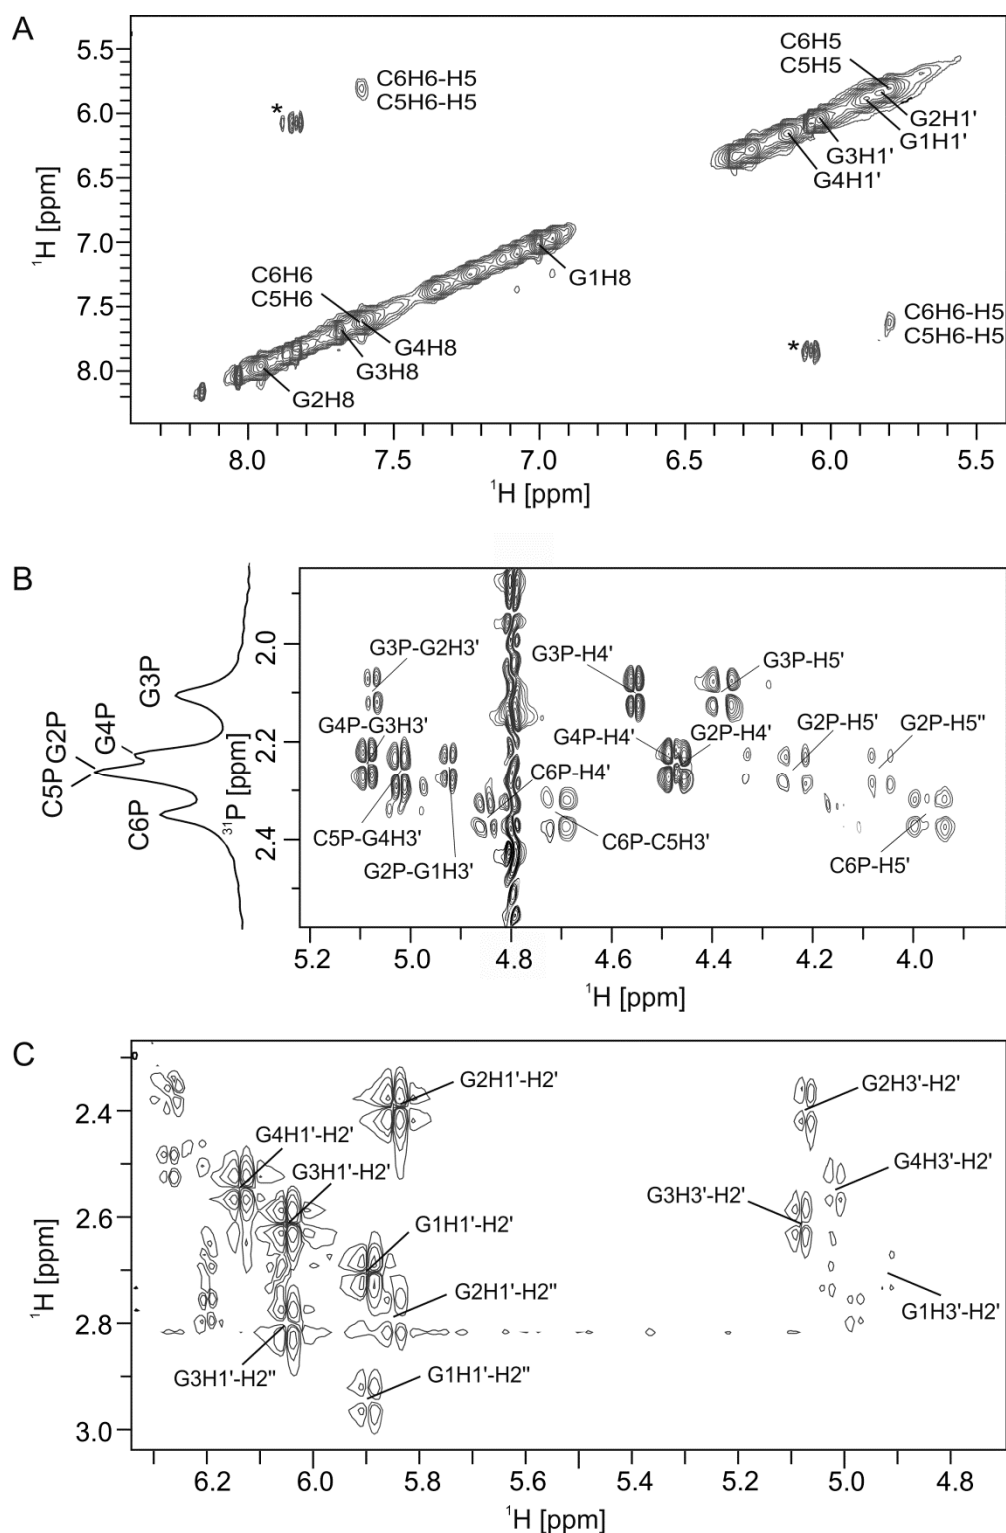

Figure S6: A) Aromatic and anomeric regions of TOCSY spectrum ( $\tau_m=20$  ms) of  $[d(G_4C_2)]_4$ . B)  $^1H$ - $^{31}P$  COSY spectrum of  $[d(G_4C_2)]_4$  with  $^{31}P$  NMR spectrum shown on the left hand side. C) Sugar H1'/H3' - sugar H2'/H2'' region of DQF-COSY spectrum of  $[d(G_4C_2)]_4$ . Spectra were recorded on 600 MHz NMR spectrometer, 25 °C in 100 %  $D_2O$ , 100 mM  $^{15}NH_4Cl$ , pH 6.0. Oligonucleotide concentration was 2.0 mM. Asterisks in A denote organic impurity in the sample. Assignments are indicated next to the cross-peaks.

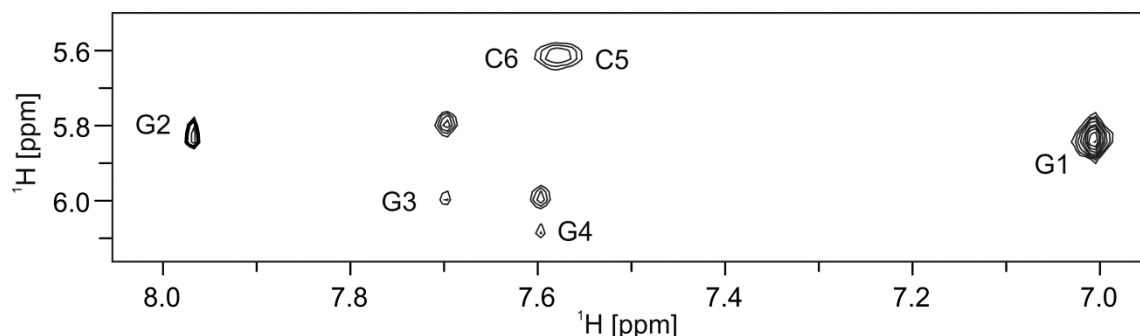

Figure S7: The aromatic H6/H8 – anomeric H1' region of NOESY spectrum ( $\tau_m = 80$  ms) of  $[d(G_4C_2)]_4$ . Assignments are shown next to corresponding cross-peaks. Stronger intensity of G1H8-H1' in comparison to cross-peaks corresponding to other residues indicates *syn* orientation around glycosidic bond for G1. Spectrum was recorded on 600 MHz NMR spectrometer, 25 °C in 100%  $^2H_2O$ , 100 mM  $^{15}NH_4Cl$ , pH 6.0. Oligonucleotide concentration was 2 mM. Note that chemical shifts of C5H6 and C6H6 depend on  $^2H_2O$  concentration.

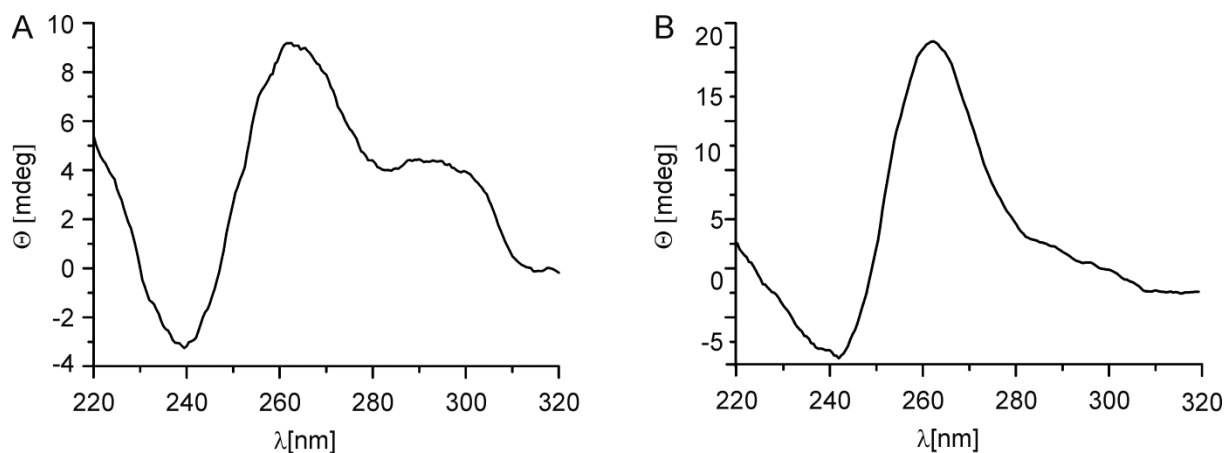

Figure S8: A) CD spectrum of oligonucleotide  $d(G_4C_2)$  in presence of 100 mM  $^{15}NH_4Cl$ . B) CD spectrum of oligonucleotide  $d(G_4C_2)$  in presence of 100 mM  $^{15}NH_4Cl$  and 80 mM KCl. Both spectra were recorded at 2mM concentration of  $d(G_4C_2)$  in 10 mM Li-Cacodylate buffer, pH 6.0 at 25 °C.

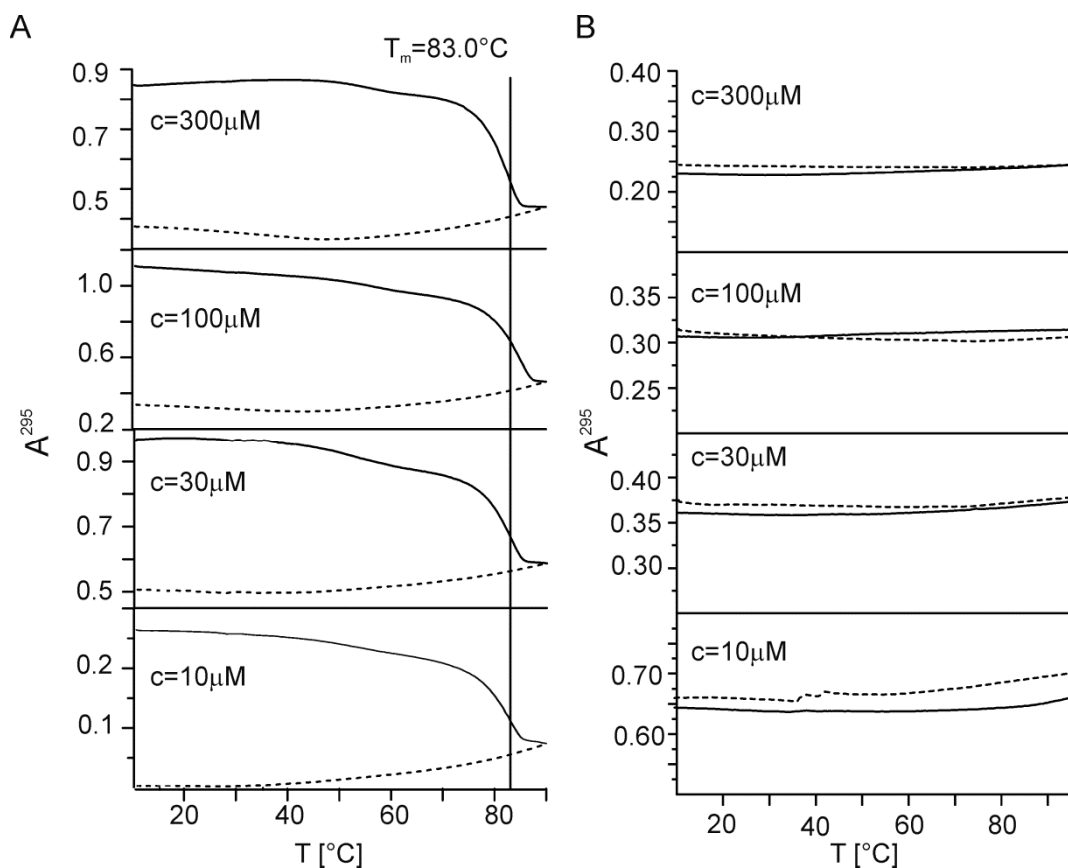

Figure S9: A) Normalized UV melting and annealing curves of d(G<sub>4</sub>C<sub>2</sub>) oligonucleotide in the presence of 100 mM <sup>15</sup>NH<sub>4</sub>Cl obtained at 295 nm. B) Normalized UV melting and annealing curves of d(G<sub>4</sub>C<sub>2</sub>) oligonucleotide in the presence of 80 mM KCl and 100 mM <sup>15</sup>NH<sub>4</sub>Cl at 295 nm. Spectra were recorded in 10 mM Li-cacodylate buffer, pH 6.0. Oligonucleotide concentrations are indicated next to the spectra. Concentration of oligonucleotide is marked on each plot.

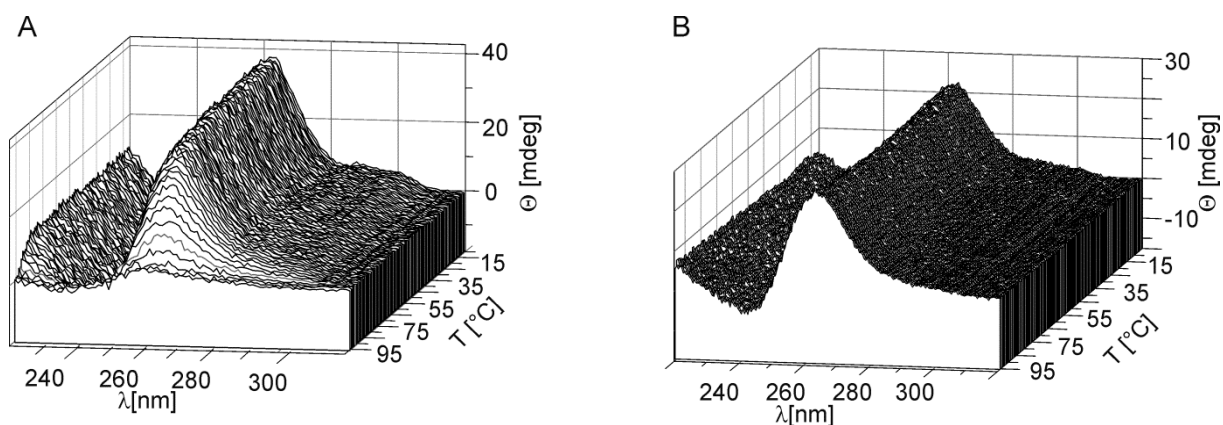

Figure S10: CD melting curve of d(G<sub>4</sub>C<sub>2</sub>) oligonucleotide in the presence of A) 100 mM <sup>15</sup>NH<sub>4</sub>Cl and B) 80 mM KCl and 100 mM <sup>15</sup>NH<sub>4</sub>Cl. Spectra were recorded in 10 mM Li-cacodylate buffer, pH 6.0. Concentration of oligonucleotide was 70 μM.



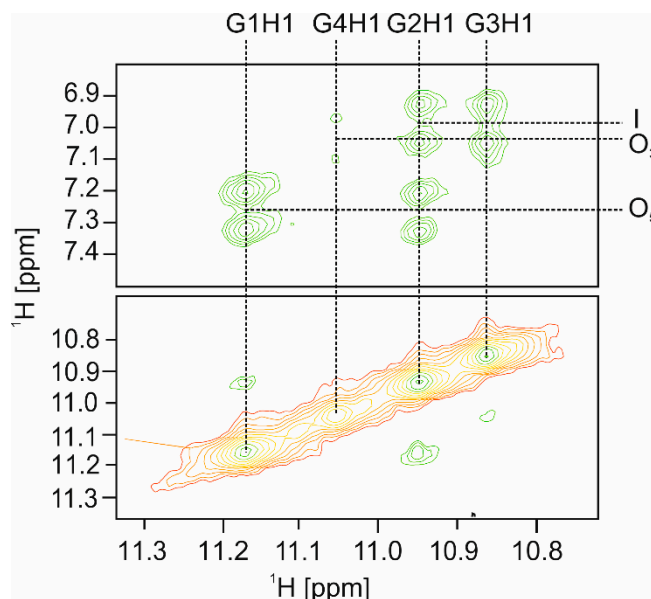

Figure S11: Imino – imino and imino - aromatic regions of ROESY spectrum ( $\tau_m = 80$  ms) of  $[d(G_4C_2)]_4$ . Green cross-peaks have a negative sign indicating cross-relaxation and correspond to interactions between imino protons and  $^{15}\text{NH}_4^+$  ions. Vertical and horizontal dashed lines indicate resonance frequencies of imino protons and  $^{15}\text{NH}_4^+$  ions at individual binding sites, respectively. Spectrum was recorded on 600 MHz NMR spectrometer, 25 °C in 90%  $\text{H}_2\text{O}$  and 10%  $^2\text{H}_2\text{O}$ , 100 mM  $^{15}\text{NH}_4\text{Cl}$ , pH 6.0. Oligonucleotide concentration was 2 mM.

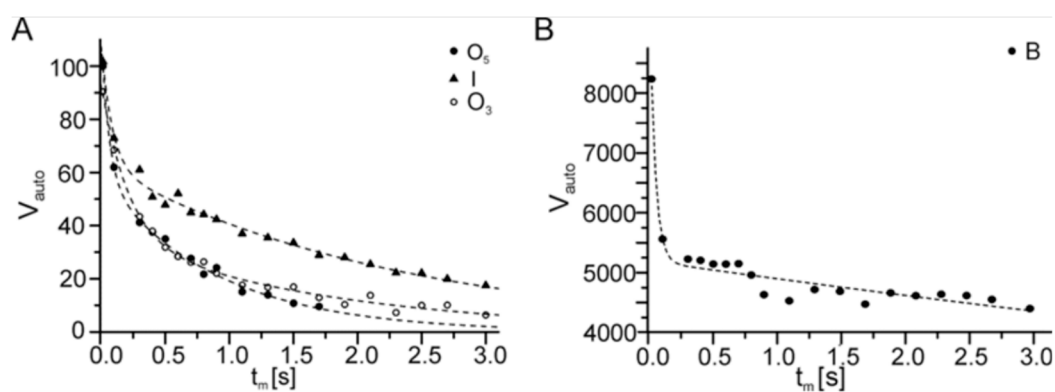

Figure S12: Relative volumes of autocorrelation peaks A)  $\text{O}_5$  (black circles), I (black triangles)  $\text{O}_3$  (empty circles) and B) ions in bulk solution as a function of mixing time ( $\tau_m$ ) at 25°C. Best fits of experimental data points to Eq. 1 are shown in black dashed curves. Parameters that best fit individual experimental data sets are listed in Table S1.

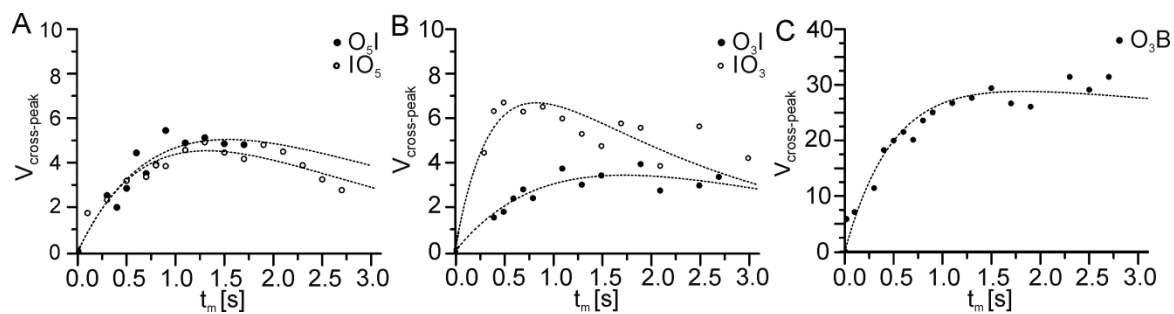

Figure S13: Relative volumes of cross- peaks A)  $O_5I$  and  $IO_5$  shown in black and empty circles, respectively, B)  $O_3I$  and  $IO_3$  (black and empty circles, respectively) and C)  $O_3B$  as functions of mixing time ( $t_m$ ) at 25°C. Best fits of experimental data points to Eq. 2 are shown in black dashed curves. Parameters that best fit individual experimental data sets are listed in Table S2.

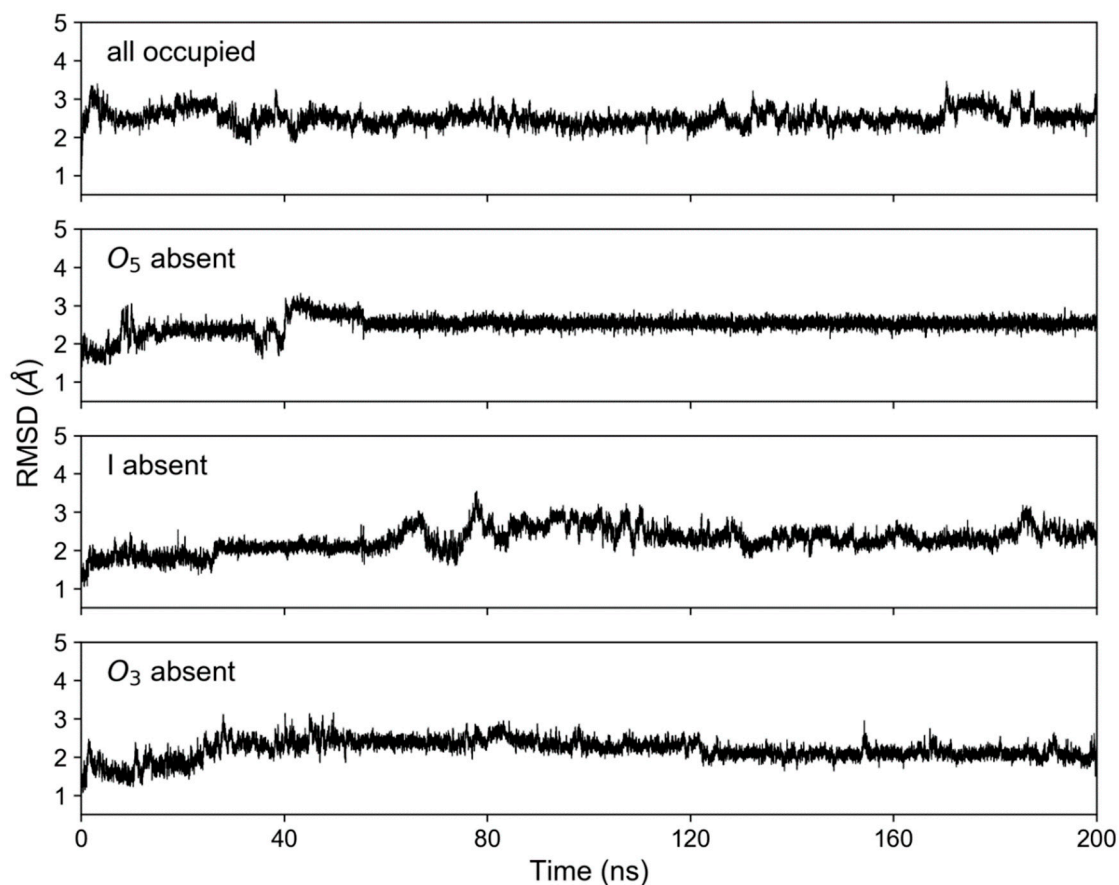

**Figure S14:** Backbone RMSD of the  $[d(G_4C_2)]_4$  G-quadruplex in the presence of ammonium ions with respect to the starting structure from MD simulation with ammonium ions present at binding sites  $O_5$ ,  $I$  and  $O_3$ , absent at binding sites  $O_5$ ,  $I$  or  $O_3$ .

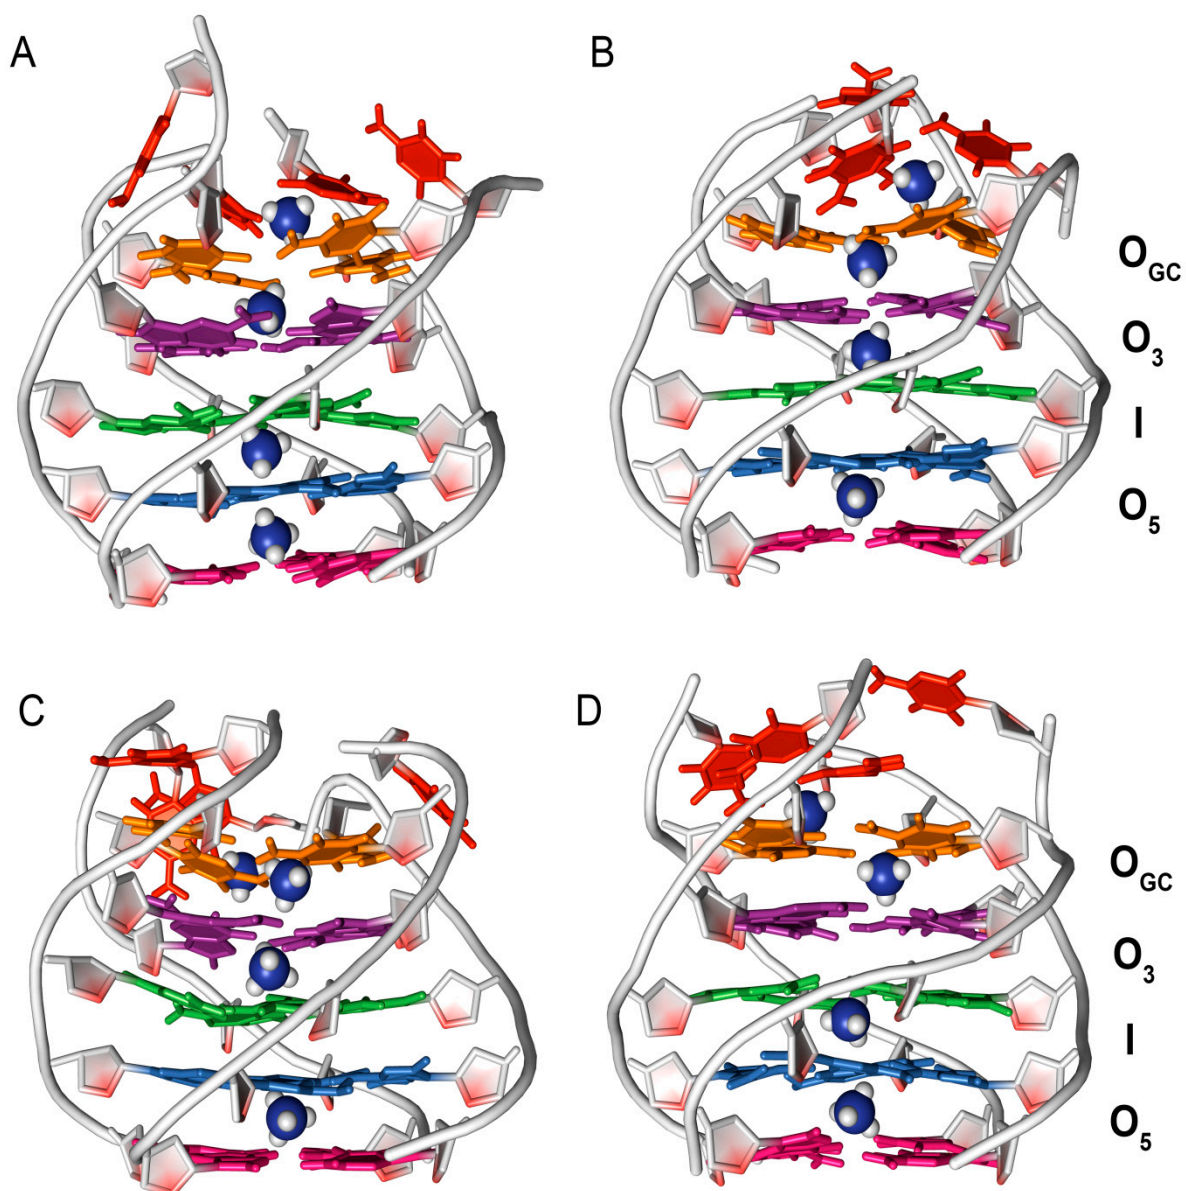

**Figure S15:** The structure  $[d(G_4C_2)]_4$  G-quadruplex from the last frame of MD simulations with ammonium ions present in A) at binding sites  $O_5$ , I and  $O_3$ , or absent in B) at binding site  $O_5$ , C) at binding site I and D) at binding site  $O_3$ . The ammonium ion binding sites are labeled. The ammonium ions are showing in sphere model.

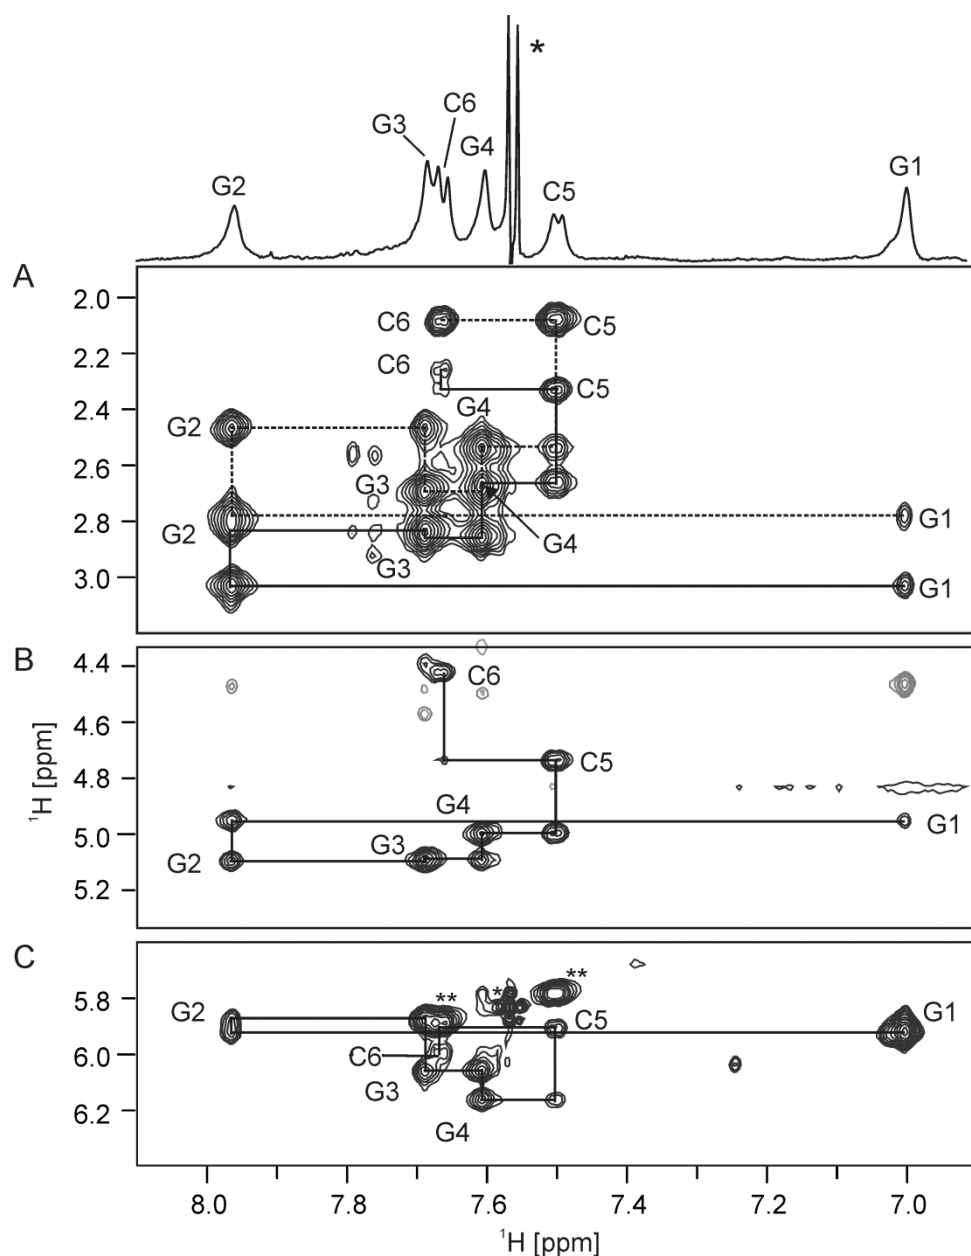

Figure S16: The aromatic H6/H8 –sugar H2'/H2'' (A), H3' (B) and H1' (C) regions of NOESY spectrum ( $\tau_m = 150$  ms) of  $[d(G_4C_2)]_4$ . All sequential walks except H8/H6-H2', which is shown with dashed black line, are depicted in solid black lines. Assignments are shown next to corresponding cross-peaks. Aromatic region of  $^1H$  NMR spectrum is shown on top together with signal assignments. Signals labeled with \* correspond to organic impurity while \*\* denotes H5-H6 cross-peaks of cytosines. Spectrum was recorded on 600 MHz NMR spectrometer, 25 °C in 90%  $H_2O$  and 10%  $^2H_2O$ , 80 mM KCl and 100 mM  $^{15}NH_4Cl$ , pH 6.0. Oligonucleotide concentration was 2 mM.

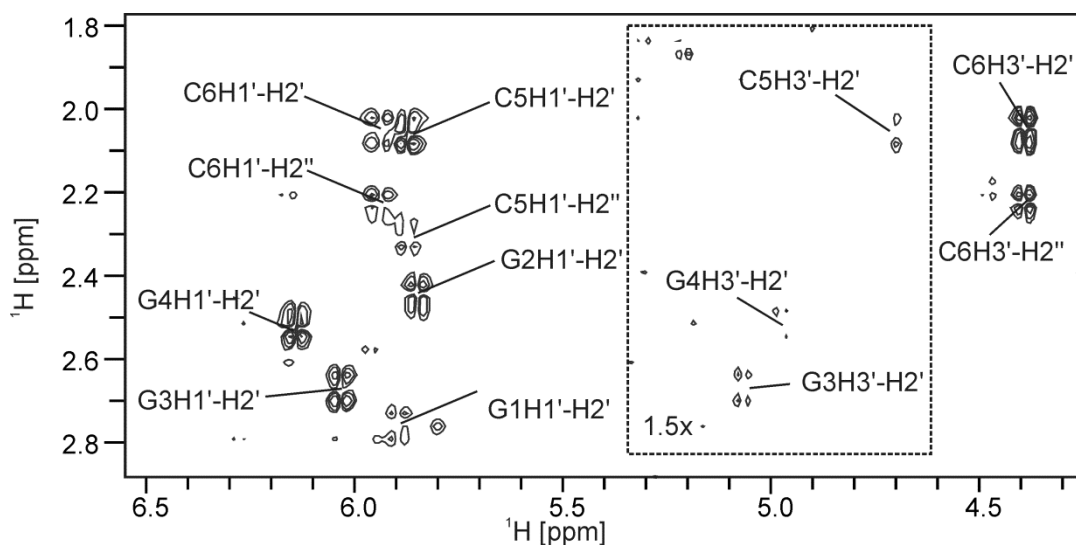

Figure S17: Sugar H1'/H3' –sugar H2'/H2'' region of DQF-COSY spectrum of  $[d(G_4C_2)]_4$ . Assignments are shown next to cross-peaks. Intensity of region indicated by black dashed square was increased by 1.5 fold in respect to the rest of region. Spectrum was recorded on 600 MHz NMR spectrometer, 25 °C in 100 %  $^2H_2O$ , 80 mM KCl and 100 mM  $^{15}NH_4Cl$ , pH 6.0. Oligonucleotide concentration was 2 mM.

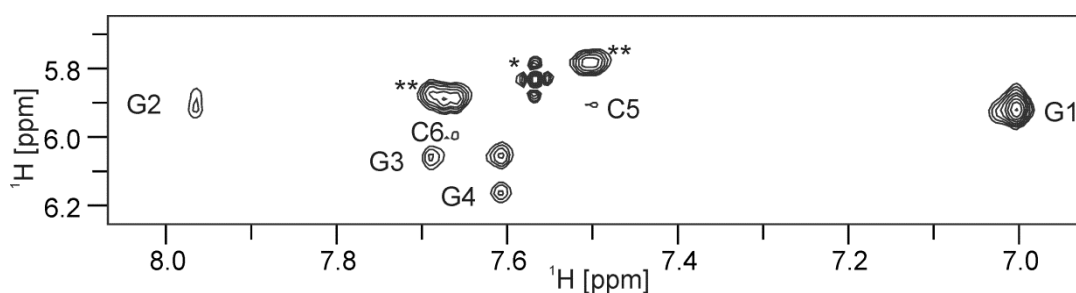

Figure S18: The aromatic H6/H8 – anomeric H1' region of NOESY spectrum ( $\tau_m = 80$  ms) of  $[d(G_4C_2)]_4$ . Assignments are shown next to corresponding cross-peaks. Stronger intensity of G1H8-H1' in comparison to cross-peaks corresponding to other residues indicates *syn* orientation around glycosidic bond for G1. Signals labeled with \* correspond to organic impurity while \*\* denotes H5-H6 cross-peaks of cytosines. Spectrum was recorded on 600 MHz NMR spectrometer, 25 °C in 90%  $H_2O$  and 10%  $^2H_2O$ , 80 mM KCl and 100 mM  $^{15}NH_4Cl$ , pH 6.0. Oligonucleotide concentration was 2 mM.

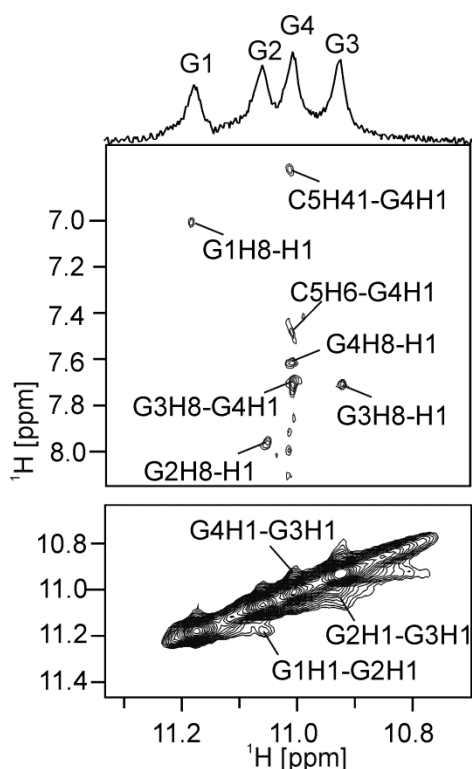

Figure S19: Imino -aromatic and imino-imino regions of NOESY spectrum ( $\tau_m = 150$  ms) of  $[d(G_4C_2)]_4$ . Assignments are shown next to corresponding cross-peaks. Imino region of  $^1H$  spectrum is shown on top together with signal assignments. Spectrum was recorded on 600 MHz NMR spectrometer, 25 °C in 90%  $H_2O$  and 10%  $^2H_2O$ , 80 mM KCl and 100 mM  $^{15}NH_4Cl$ , pH 6.0. Oligonucleotide concentration was 2 mM.

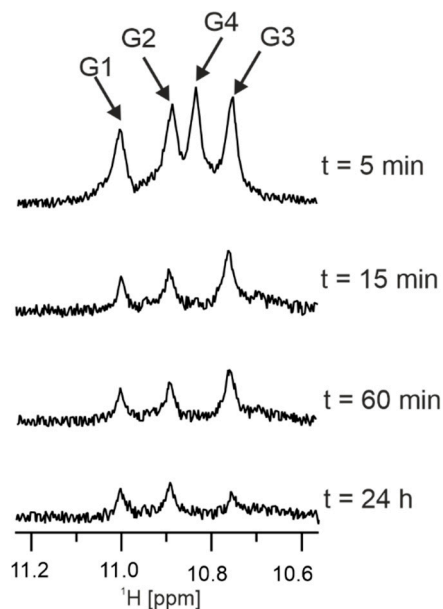

Figure S20: Imino region of  $^1H$  spectra of  $[d(G_4C_2)]_4$  G-quadruplex recorded at different times after dissolving into 100 %  $^2H_2O$ . Assignments are shown next to signals. Spectra were recorded on 600 MHz NMR spectrometer, 25°C, 80 mM KCl and 100 mM  $^{15}NH_4Cl$ . Oligonucleotide concentration was 2 mM.

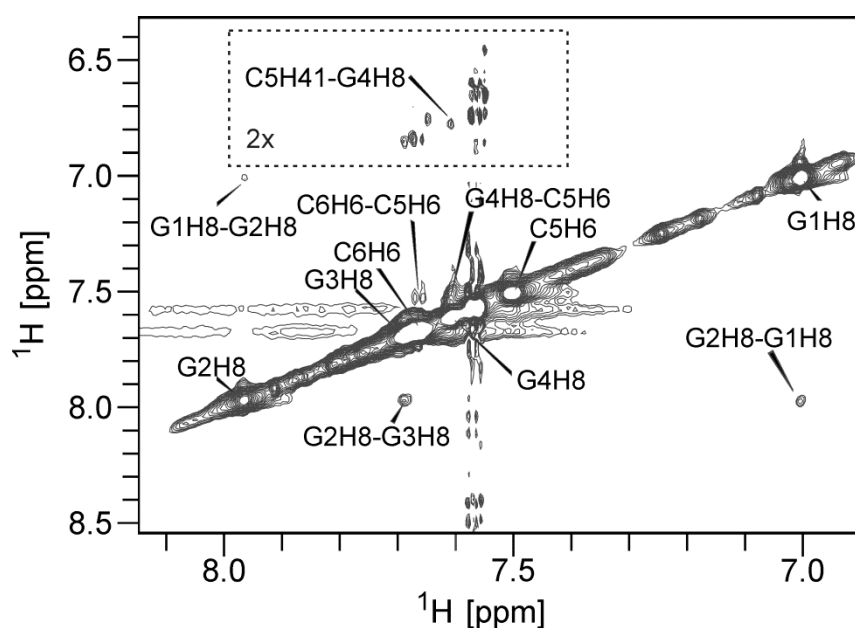

Figure S21: Aromatic region of NOESY spectrum ( $\tau_m = 150$  ms) of  $[d(G_4C_2)]_4$ . Assignments are shown next to corresponding cross-peaks. The aromatic protons of individual residues are noted only with a name of the corresponding residue. Spectrum was recorded on 600 MHz NMR spectrometer, 25 °C in 90%  $H_2O$  and 10%  $^2H_2O$ , 80 mM KCl and 100 mM  $^{15}NH_4Cl$ , pH 6.0. Oligonucleotide concentration was 2 mM.

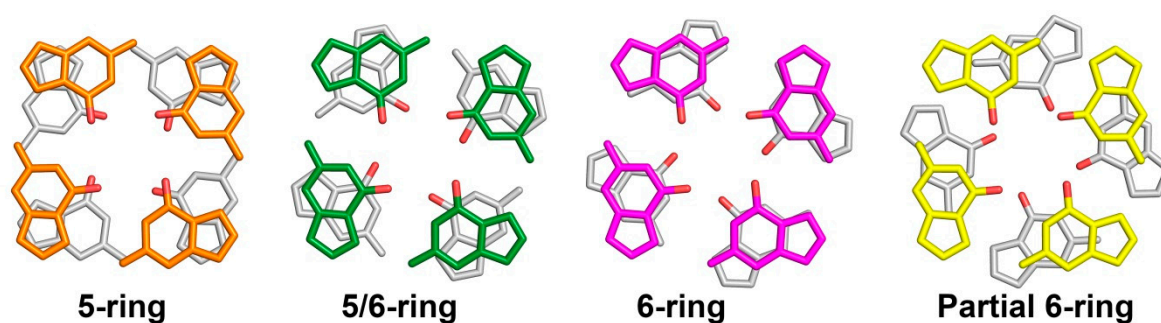

Figure S22: G-quartet base stacking modes at the interface of stacked G-quadruplexes as observed in crystallographic structures.

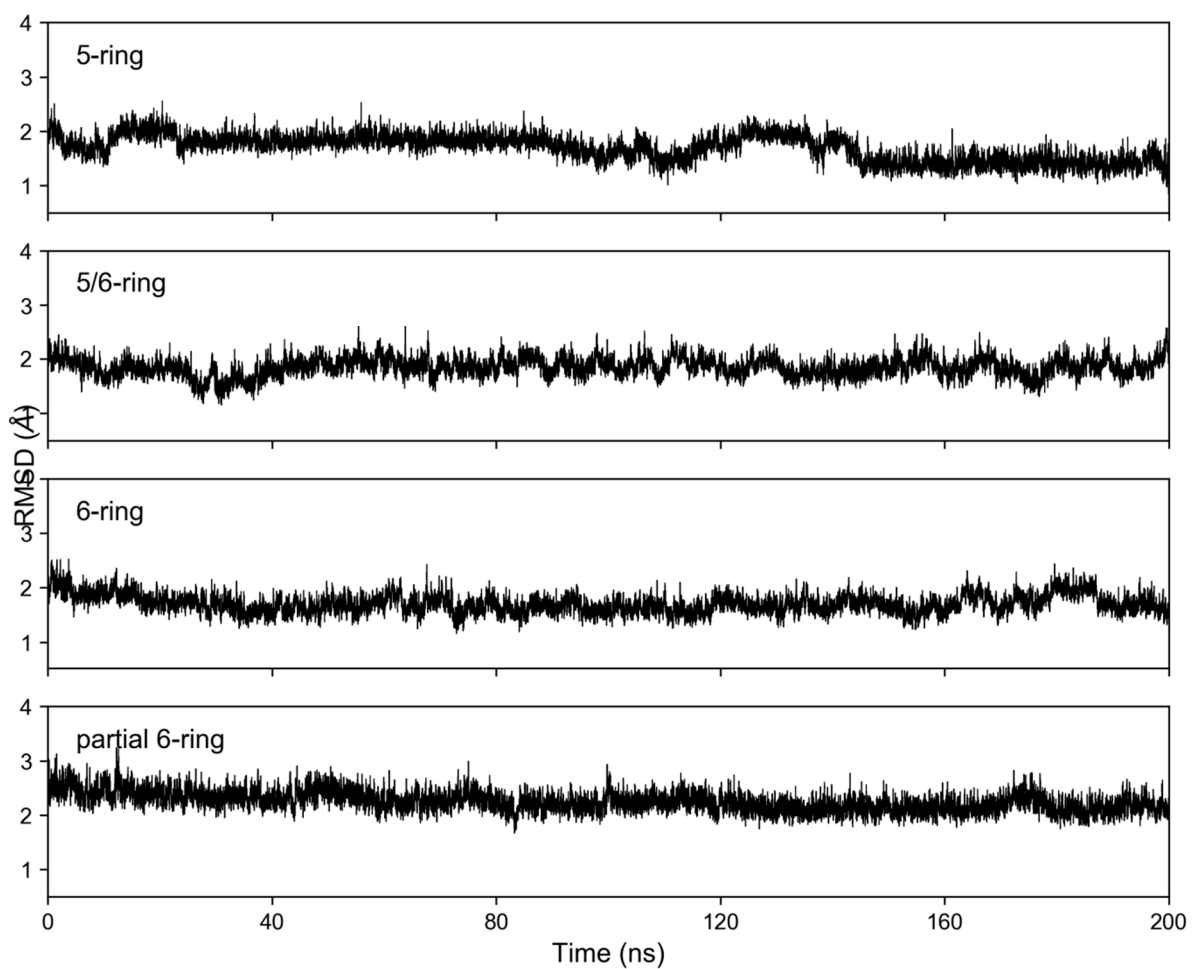

Figure S23: Backbone RMSD of the  $[d(G_4C_2)]_4$  G-quadruplex dimers in  $K^+$  ions solution with respect to the last frame of the simulation of dimer interface G-quartets initially stacking in 5-membered ring mode.



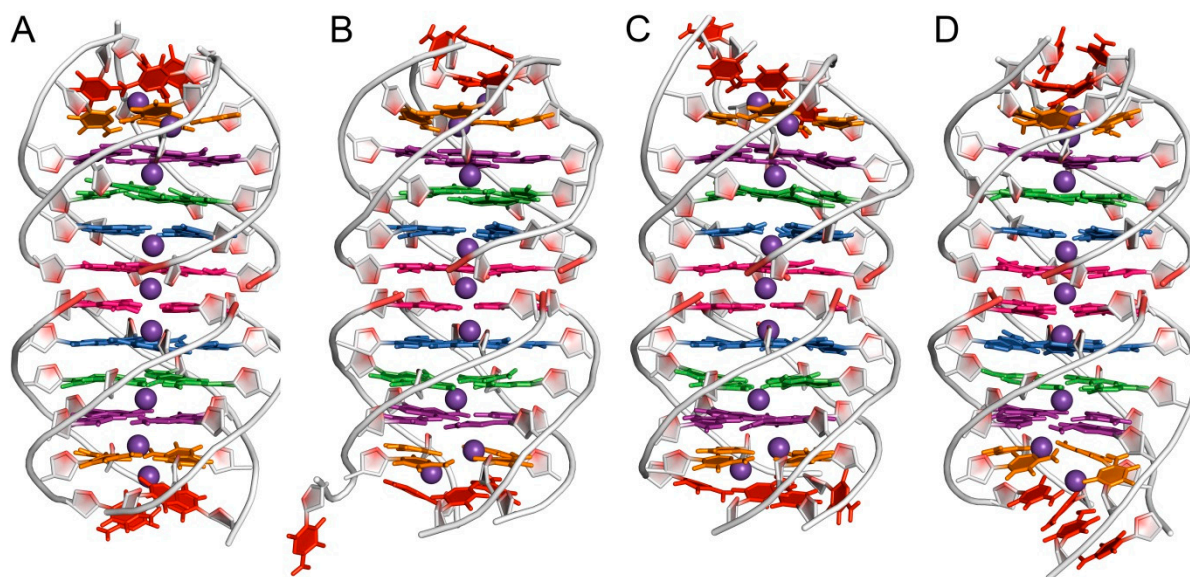

**Figure S24: The structure of dimeric form of  $[d(G_4C_2)]_4$  G-quadruplex** from the last frame of MD simulation with dimer interface G-quartets initially stacking in A) 5-membered ring mode, B) '5/6-membered ring mode, C) 6-membered ring mode and D) partial 6-membered ring mode. The potassium ions are showing in sphere model.

## SUPPLEMENTARY TABLES

Table S1: Fitting parameters for autocorrelation peaks

|                              | <b>O<sub>5</sub></b> |              | <b>I</b>     |              | <b>O<sub>3</sub></b> |              | <b>B</b>              |              |
|------------------------------|----------------------|--------------|--------------|--------------|----------------------|--------------|-----------------------|--------------|
|                              | <b>value</b>         | <b>error</b> | <b>value</b> | <b>error</b> | <b>value</b>         | <b>error</b> | <b>value</b>          | <b>error</b> |
| A                            | 58.0                 | 2.6          | 62.8         | 1.6          | 57.9                 | 3.1          | 4073                  | 442          |
| B                            | 53.2                 | 3.2          | 45.7         | 3.0          | 35.9                 | 3.2          | 5317                  | 97           |
| T <sub>1</sub> <sup>-1</sup> | 1.11                 | 0.07         | 0.43         | 0.02         | 0.56                 | 0.06         | 0.06                  | 0.01         |
| r <sub>2</sub>               | 16.7                 | 2.6          | 11.9         | 2.0          | 4.9                  | 0.6          | 24.4                  | 6.7          |
| Reduced $\chi^2$             | 2.59                 |              | 3.96         |              | 2.68                 |              | 2.55*10 <sup>10</sup> |              |
| R <sup>2</sup>               | 0.996                |              | 0.991        |              | 0.994                |              | 0.9502                |              |

Table S2: Fitting parameters for cross peaks

|                  | <b>O<sub>5</sub>I</b> |              | <b>I O<sub>5</sub></b> |              | <b>I O<sub>3</sub></b> |              | <b>O<sub>3</sub>I</b> |              | <b>O<sub>3</sub>B</b> |              |
|------------------|-----------------------|--------------|------------------------|--------------|------------------------|--------------|-----------------------|--------------|-----------------------|--------------|
|                  | <b>value</b>          | <b>error</b> | <b>value</b>           | <b>error</b> | <b>value</b>           | <b>error</b> | <b>value</b>          | <b>error</b> | <b>value</b>          | <b>error</b> |
| A                | 111                   |              | 109                    |              | 109                    |              | 94                    |              | 94                    |              |
| f                | 0.17                  | 0.06         | 0.11                   | 0.01         | 0.16                   | 0.05         | 0.12                  | 0.01         | 0.30                  | 0.02         |
| T <sub>1</sub>   | 2.3                   |              | 2.3                    |              | 2.3                    |              | 2.3                   |              | 16.7                  |              |
| k                | 0.5                   | 0.2          | 0.8                    | 0.2          | 0.3                    | 0.1          | 2.1                   | 0.4          | 1.6                   | 0.3          |
| Reduced $\chi^2$ | 0.29                  |              | 0.18                   |              | 0.14                   |              | 0.71                  |              | 10.01225              |              |
| R <sup>2</sup>   | 0.889                 |              | 0.895                  |              | 0.878                  |              | 0.759                 |              | 0.857                 |              |

Table S3: Structural statistics for [d(G<sub>4</sub>C<sub>2</sub>)]<sub>4</sub> G-quadruplexes in the presence of <sup>15</sup>NH<sub>4</sub>Cl (PDB ID 8C7B) and KCl (PDB ID 8C7A).

|                                                  | <sup>15</sup> NH <sub>4</sub> Cl | KCl       |
|--------------------------------------------------|----------------------------------|-----------|
| <b>NMR distance and torsion angle restraints</b> |                                  |           |
| NOE-derived distance restraints                  | 256                              | 380       |
| Intra-residue                                    | 164                              | 236       |
| inter-residue                                    | 92                               | 144       |
| Sequential                                       | 92                               | 144       |
| Hydrogen bond restraints                         | 32                               | 32        |
| Torsion angle restraints                         | 40                               | 24        |
| <b>Structure statistics</b>                      |                                  |           |
| Violations                                       |                                  |           |
| Mean NOE restraint violation (Å)                 | 0.1±0.1                          | 0.1±0.1   |
| Max. NOE restraint violation (Å)                 | 0.184                            | 0.184     |
| Max. torsion angle restraint violation (°)       | 0.00                             | 0.50      |
| Pairwise heavy atom RMSD (Å)                     |                                  |           |
| Overall                                          | 1.66±0.36                        | 1.31±0.41 |
| G1-G4                                            | 0.80±0.21                        | 0.68±0.12 |
| G1-C5                                            | 0.97±0.23                        | 0.84±0.15 |
